# Supplementary material for: Entanglement is a costly life‐history stage in large whales
Source: PubMed Central journal article supplement (PMC5213775; doi:10.1002/ece3.2615), 2016-12-11

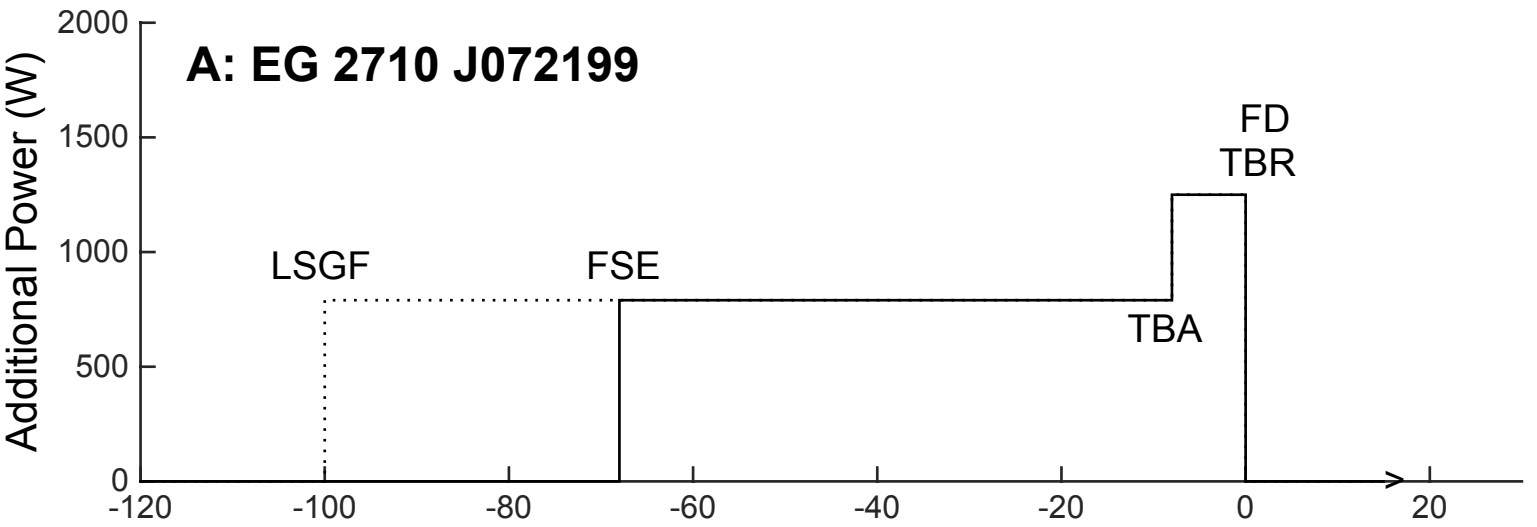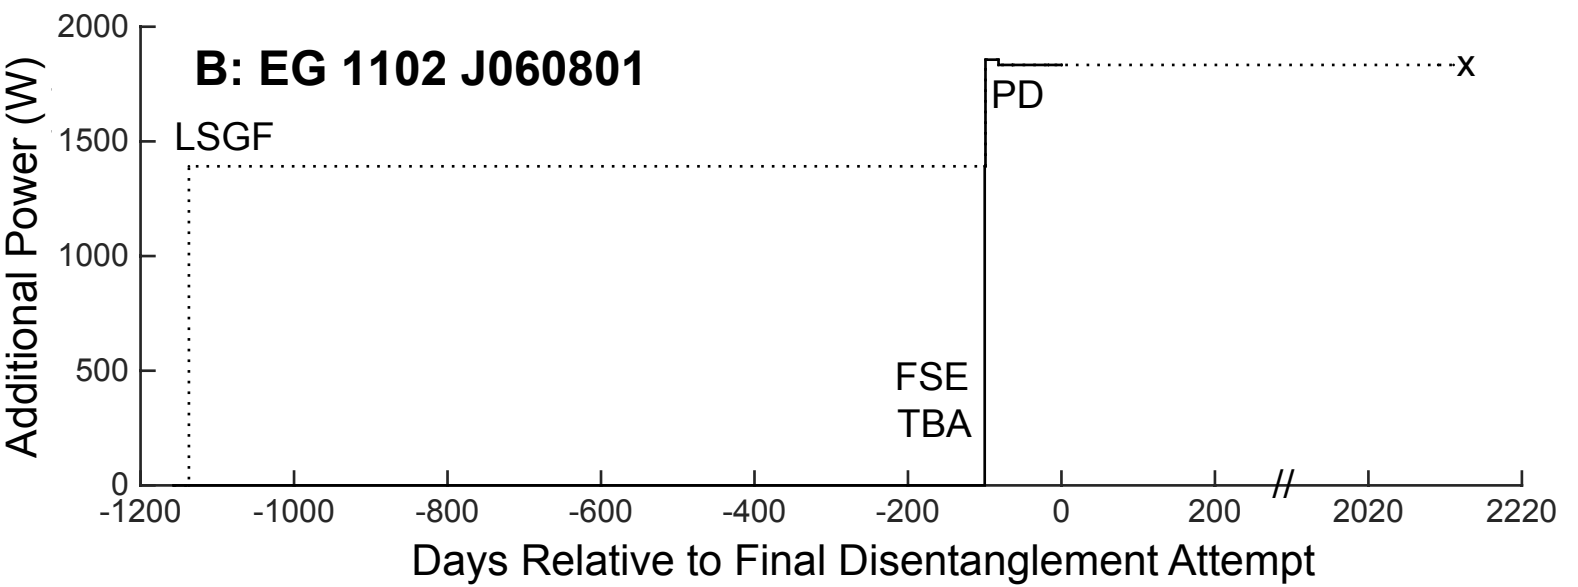

Supplement: ECE3-7-92-s001.pdf [file ECE3-7-92-s001.pdf]
